# Supplementary material for: Tick Activity, Host Range, and Tick-Borne Pathogen Prevalence in Mountain Habitats of the Western Carpathians, Poland
Source: MDPI journal article supplement (doi:10.3390/pathogens12091186), 2023-09-21
Supplement: s1 [file s1]

Table S1.Total number of *Ixodes ricinus* ticks collected at particular study sites during whole study period, depending on the latitude; m a.s.l. – meters above sea level, N – nymphs, F – females, M – males.

| Studied region                            | Study site    | Latitude (m a.s.l) | Tick stage/Total number of collected ticks |     |     | Total |
|-------------------------------------------|---------------|--------------------|--------------------------------------------|-----|-----|-------|
|                                           |               |                    | N                                          | F   | M   |       |
| Foothill of Western Carpathians mountains | A (Rzeszów N) | 191                | 62                                         | 59  | 57  | 178   |
|                                           | B (Rzeszów S) | 251                | 40                                         | 53  | 45  | 138   |
|                                           | C (Jawornik)  | 284                | 12                                         | 70  | 54  | 136   |
|                                           | D (Kombornia) | 363                | 30                                         | 65  | 50  | 145   |
|                                           | E (Rogi)      | 299                | 109                                        | 85  | 87  | 281   |
| Western Carpathians mountains             | F (Chyrowa)   | 529                | 94                                         | 74  | 79  | 247   |
|                                           | G (Ropianka)  | 465                | 115                                        | 75  | 77  | 267   |
|                                           | H (Mszana)    | 447                | 94                                         | 98  | 71  | 263   |
|                                           | J (Barwinek)  | 470                | 209                                        | 76  | 68  | 353   |
| Total                                     |               |                    | 765                                        | 655 | 588 | 2008  |
