# Supplementary material for: Tick Activity, Host Range, and Tick-Borne Pathogen Prevalence in Mountain Habitats of the Western Carpathians, Poland
Source: MDPI journal article supplement (doi:10.3390/pathogens12091186), 2023-09-21
Supplement: s1 [file s1]

Table S2. Co-infections of pathogens detected in questing *I. ricinus* adults collected in studied habitats, n – number of tested samples.

| Co-infections                                          | Number of positive samples and percentage rate (%) |                 |                                           |                 |                                                            |                 |
|--------------------------------------------------------|----------------------------------------------------|-----------------|-------------------------------------------|-----------------|------------------------------------------------------------|-----------------|
|                                                        | Meadow habitat of the Western Carpathians          |                 | Forest habitat of the Western Carpathians |                 | Forest habitat of the foothills of the Western Carpathians |                 |
|                                                        | Females<br>n = 42                                  | Males<br>n = 14 | Females<br>n = 42                         | Males<br>n = 14 | Females<br>n = 42                                          | Males<br>n = 14 |
| <i>Borrelia valaisiana</i> + <i>Borrelia miyamotoi</i> | 1 (2.38)                                           | 0 (0.00)        | 0 (0.00)                                  | 0 (0.00)        | 0 (0.00)                                                   | 0 (0.00)        |
| <i>Borrelia afzelii</i> + <i>Rickettsia helvetica</i>  | 0 (0.00)                                           | 1 (7.14)        | 0 (0.00)                                  | 0 (0.00)        | 0 (0.00)                                                   | 0 (0.00)        |
| <i>Borrelia</i> spp. + <i>Ehrlichia</i> spp.           | 1 (2.38)                                           | 0 (0.00)        | 0 (0.00)                                  | 0 (0.00)        | 0 (0.00)                                                   | 0 (0.00)        |
| <i>Rickettsia helvetica</i> + <i>Ehrlichia</i> spp.    | 0 (0.00)                                           | 1 (7.14)        | 1 (2.38)                                  | 0 (0.00)        | 1 (2.38)                                                   | 0 (0.00)        |
| <i>Borrelia lusitaniae</i> + <i>Babesia venatorum</i>  | 0 (0.00)                                           | 0 (0.00)        | 2 (4.76)                                  | 0 (0.00)        | 0 (0.00)                                                   | 0 (0.00)        |
| <i>Borrelia afzelii</i> + <i>Ehrlichia</i> spp.        | 0 (0.00)                                           | 0 (0.00)        | 1 (2.38)                                  | 0 (0.00)        | 2 (4.76)                                                   | 0 (0.00)        |
| <i>Borrelia lusitaniae</i> + <i>Rickettsia</i> spp.    | 0 (0.00)                                           | 0 (0.00)        | 0 (0.00)                                  | 1 (7.14)        | 0 (0.00)                                                   | 0 (0.00)        |
